# Supplementary material
Source: PubMed Central journal article supplement (PMC3246251)
Supplement: embor2011223s1.pdf [file embor2011223s1.pdf]

## **Supplementary information:**

### **Methods**

#### ***Drosophila* stocks:**

We used *5015-Gal4*, *bit-Gal4* (Ohshiro & Saigo, 1997), *Lsp2-Gal4* (Cherbas et al, 2003), *A58-Gal4* (Galko & Krasnow, 2004), *Dilp2-Gal4* (Broughton et al, 2010), *Antp-Gal4* (Mandal et al, 2007), *Ser-Gal4*, *hand-Gal4* (Han et al, 2006), *c127-Gal4* (Hewes et al, 2003), *ap-Gal4* (Rincon-Limas et al, 1999), *Hml-Gal4* (Sinenko & Mathey-Prevot, 2004), *dome-Gal4* (Ghiglione et al, 2002), *Dot-Gal4* (Kimbrell et al, 2002) to express target genes in corresponding larval tissue. *UAS-RNAi* lines were obtained from the Vienna *Drosophila* RNAi Center (Austria) and the *Drosophila* Genetic Resource Center (Japan). *UAS-s.spi* and *UAS-vn* were gifts from A. Simcox. *UAS-Egfr<sup>DN</sup>*, *UAS-Cat*, *UAS-SOD2*, *UAS-Foxo*, *S<sup>l</sup>* mutant stocks were obtained from Bloomington *Drosophila* Stock Center. *UAS-Egfr<sup>ΔTOP</sup>* was a gift from T. Schupbach (Queenan et al, 1997). The recombineered gene line (*gRho1-YGP*) was kindly provided by B.-Z. Shilo (Yogev et al, 2010).

#### **Immunocytochemistry and cell counts:**

Antibodies against Antennapedia (*Antp*, 4C3), L1(Honti et al, 2010) and Prophenoloxidase (PPO)(Muller et al, 1999) were used to identify corresponding cell lineages. Nuclear DNA was visualized with the ToPro-3 dye (Invitrogen). EGFR activation was monitored with the use of anti-diphosphorylated Erk kinase (dpERK) antibody (Sigma-Aldrich, Inc). Cy3-labeled anti-mouse and -rabbit secondary antibodies were obtained from Jackson ImmunoResearch Laboratories, Inc. Hemocyte immunostaining was performed as previously described, with the use of Cy3-labeled secondary antibodies (Jackson ImmunoResearch Laboratories) (Sinenko et al, 2004). Briefly, hemocytes from single larvae were isolated in 30μl of Schneider's medium into

14-well glass slides (Fisher Scientific Inc, USA) and incubated for 30 min and fixed with 4% formaldehyde (Polysciences, Inc) for 10 min. Glass wells were washed once and processed for immunostaining. After immunostaining absolute numbers of lamellocytes or crystal cells from different mutant backgrounds were counted for each sample with use of a Zeiss Axioskop 2 plus Fluorescence Stereomicroscope (20X lenses). Larval lymph gland immunostaining and ROS staining was performed as previously described (Jung et al, 2005; Owusu-Ansah & Banerjee, 2009; Owusu-Ansah et al, 2008). For determination of reactive oxygen species we used the superoxide specific dye dihydroethidium (DHE, Invitrogen) and the H<sub>2</sub>O<sub>2</sub> sensitive dye 2,3,4,5,6 pentafluorodihydroetramethylrosamine (Redox Sensor red CC-1, Invitrogen)(Kang et al, 2003). Cell and tissue samples were imaged using a BioRad Radiance 2000 and Zeiss LSM700 confocal microscopes.

**Supplementary Fig 1. ETC-mediated oxidative stress in the PSC induces differentiation of lamellocytes**

A) Oxidative stress induced by inactivation of *ND75* (*ND75<sup>RNAi</sup>*) in hematopoietic niche PSC cells (*Antp-Gal4*) causes robust increase in differentiation of lamellocytes in circulation, n = 14.

However oxidative stress induced in cells of MZ (*dome-Gal4*), dorsal vessel (*hand-Gal4*), neuronal (*c127-Gal4*), endocrinal (*5015-Gal4*), wing imaginal (*ap-Gal4*), tracheal (*btl-Gal4*) epidermal (*A58-Gal4*) or fat body tissue (*LSP2-Gal4*) has no effect on the differentiation of circulating lamellocytes, n = 10 for each experiment. Corresponding genotypes are indicated under X-axis. All data represent the mean  $\pm$  s.d.

B) Mitochondria mediated oxidative stress caused by impaired function of components of electron transport chain in the PSC induces differentiation of lamellocytes.

In wild-type (+) larvae lamellocytes do not develop, n = 14. Oxidative stress induced by inactivation of *ND75* (n = 14), *PDSW* (n = 14), *CoVa* (n = 14) and *Marf* (n = 11) with corresponding *RNAi* constructs in the PSC causes lamellocyte differentiation in circulation.

C) Oxidative stress in the PSC cells (*Antp-Gal4, UAS-ND75<sup>RNAi</sup>*) has no significant effect on differentiation of crystal cells in the larval circulation (p = 0.36, n ≥ 10).

D) Oxidative stress in the PSC cells (*HHLT-Gal4, UAS-ND75<sup>RNAi</sup>*) has no significant effect on total hemocytes number in larval circulation (p > 0.42, n ≥ 10, vast majority of the circulating hemocytes (~95%) are plasmatocytes).

E) Induction of apoptosis in PSC cells by overexpression of the Hid and Reaper (Rpr) pro-apoptotic proteins does not affect lamellocyte differentiation in larval circulation (*Antp-Gal4, UAS-Hid, Rpr*, n = 14) compared with oxidatively challenged PSC (*Antp-Gal4, UAS-ND75<sup>RNAi</sup>*, n = 14).

**Supplementary Fig 2. ETC-mediated oxidative stress induces activation of FoxO in the PSC cells.**

(A) Inactivation of *ND75* in PSC (+) causes significant increase in lamellocyte numbers, n = 14. Inactivation of JNK pathway by overexpression of dominant negative form of *basket* (*bsk<sup>DN</sup>*) or activation of the pathway by overexpression of *misshapen* (*msn*) in the *ND75* deficient PSC does not significantly affect the lamellocyte response (p = 0.14, n = 10 and p = 0.18, n = 17, respectively). All error bars shown represent standard deviation from the mean.

(B-B') In wild type, *4E-BP-LacZ* (*Antp-Gal4, UAS-GFP; 4E-BP-lacZ, red*) is not active in PSC cells.

(C-C') Inactivation of *ND75* (*Antp-Gal4, UAS-GFP, UAS-ND75<sup>RNAi</sup>; 4E-BP-LacZ*), in PSC cells causes robust up-regulation of *4E-BP* expression (red).

D) Non-stressed conditions do not cause lamellocyte response by further ROS reduction in the PSC.

In wild type (*Antp-Gal4/+*), lamellocytes are not seen in circulation, n = 14.

Inactivation of *ND75* in the PSC (*Antp-Gal4, UAS-ND75<sup>ND75i</sup>*), which would raise ROS causes significant increase in lamellocyte numbers, n = 14.

However, overexpression of SOD2 (n = 10), Foxo (n = 14), *Foxo<sup>RNAi</sup>* (n = 11), Akt1 (n = 12) or *Akt1<sup>RNAi</sup>* (n = 10) in the PSC has no significant effect on lamellocyte differentiation in circulation (p > 0.5) as ROS in the PSC remains low.

**Supplementary Fig 3. JAK/STAT ligands, *upd*, *upd2*, *upd3*, and JNK ligand, *egr* are not required in the PSC for the lamellocyte response.**

A) Inactivation of *ND75* in PSC (+) causes significant increase in lamellocyte numbers.

Overexpression of *RNAi* of *upd3* (n = 14), *upd* (n = 10), *upd2* (n = 12) or *egr* (n = 9) in the *ND75* deficient PSC does not significantly suppress the lamellocyte differentiation in the circulation (p > 0.4). All error bars shown represent standard deviation from the mean.

(B,C) Lymph gland is normal in *Egfr<sup>TS</sup>/Egfr<sup>I8</sup>* mutants.

B) In wild-type 3<sup>rd</sup> instar larval lymph glands there are distinct cellular zones; the medullary zone populated with prohemocytes (blue) and the cortical zone where differentiated hemocytes, expressing Pxn (red) and PPO (green) reside.

C) Lymph glands are unaffected in *Egfr<sup>TS</sup>/Egfr<sup>I8</sup>* mutants raised at nonpermissive temperature (29°C) with proper zonation as revealed by cortical zone markers Pxn (red) and PPO (green).

**Supplementary Fig 4. Wasp triggered immune challenge induces high levels of ROS in the PSC.**

(A-A') Under normal growth conditions PSC cells (marked by *Antp-Gal4, UAS-GFP*, green in A') are largely negative for hydrogen peroxide sensitive dye (RedoxSensor, red in A).

(B-B') Hydrogen peroxide levels (red in B) are significantly increased in the PSC cells (green in B') after 12 hours of wasp infestation. The increase in peroxide levels

(C) Lamellocytes rarely develop in wild-type (*Antp/+*, n = 12), or when SOD2 (n = 10), Catalase (n = 10) or GPx (n = 10) are overexpressed in the PSC using *Antp-Gal4*.

Large numbers of lamellocytes develop in wild-type larvae infested by wasp (*Antp/+ (wasp)*, n = 12). Overexpression of SOD2 (*Antp-Gal4, UAS-SOD2 (wasp)*, n = 15) or Cat (*Antp-Gal4, UAS-Cat (wasp)*, n = 19) in the PSC results in a suppression of lamellocyte production in the infested mutant larvae (p < 0.0001). However overexpression GPx (*Antp-Gal4, UAS-GPx (wasp)*) in the PSC does not significantly suppress the lamellocyte production in the infected mutant larvae (p > 0.17, n = 10).

(D-D') Under normal growth conditions PSC cells (marked by *Antp-Gal4, UAS-GFP*, green outlined) are largely negative for ROS (red).

(E-E') ROS levels (red) are significantly increased in the PSC cells after wasp infestation.

(F-F') Inactivation of *spi* in the PSC (*Antp-Gal4, UAS-spi<sup>RNAi</sup>*) does not affect ROS levels (red) in the *Antp<sup>+</sup>* PSC cells (green) upon wasp infestation.

(G) In wild-type larvae (WT) 80% of *L1<sup>+</sup>* cells are *Hml<sup>+</sup>* (light blue) and about 20% are *Hml* (dark blue), n = 10. When *Egfr<sup>DN</sup>* is expressed using lineage traced *Hml<sup>+</sup>-Gal4* as a driver (*HLT Gal4/UAS-Egfr<sup>DN</sup>*), the *Hml<sup>+</sup>* *L1<sup>+</sup>* population (light blue) is essentially eliminated, n = 11.

## References

Broughton SJ, Slack C, Alic N, Metaxakis A, Bass TM, Drieger Y, Partridge L (2010) DILP-producing median neurosecretory cells in the *Drosophila* brain mediate the response of lifespan to nutrition. *Aging Cell*

Cherbas L, Hu X, Zhimulev I, Belyaeva E, Cherbas P (2003) EcR isoforms in *Drosophila*: testing tissue-specific requirements by targeted blockade and rescue. *Development* **130**: 271-284

Galko MJ, Krasnow MA (2004) Cellular and genetic analysis of wound healing in *Drosophila* larvae. *PLoS Biol* **2**: E239

Ghiglione C, Devergne O, Georgenthum E, Carballes F, Medioni C, Cerezo D, Noselli S (2002) The Drosophila cytokine receptor Domeless controls border cell migration and epithelial polarization during oogenesis. *Development* **129**: 5437-5447

Han Z, Yi P, Li X, Olson EN (2006) Hand, an evolutionarily conserved bHLH transcription factor required for Drosophila cardiogenesis and hematopoiesis. *Development* **133**: 1175-1182

Hewes RS, Park D, Gauthier SA, Schaefer AM, Taghert PH (2003) The bHLH protein Dimmed controls neuroendocrine cell differentiation in Drosophila. *Development* **130**: 1771-1781

Honti V, Csordas G, Markus R, Kurucz E, Jankovics F, Ando I (2010) Cell lineage tracing reveals the plasticity of the hemocyte lineages and of the hematopoietic compartments in Drosophila melanogaster. *Mol Immunol* **47**: 1997-2004

Jung SH, Evans CJ, Uemura C, Banerjee U (2005) The Drosophila lymph gland as a developmental model of hematopoiesis. *Development* **132**: 2521-2533

Kang BP, Frencher S, Reddy V, Kessler A, Malhotra A, Meggs LG (2003) High glucose promotes mesangial cell apoptosis by oxidant-dependent mechanism. *Am J Physiol Renal Physiol* **284**: F455-466

Kimbrell DA, Hice C, Bolduc C, Kleinhesselink K, Beckingham K (2002) The Dorothy enhancer has Tinman binding sites and drives hopscotch-induced tumor formation. *Genesis* **34**: 23-28

Mandal L, Martinez-Agosto JA, Evans CJ, Hartenstein V, Banerjee U (2007) A Hedgehog- and Antennapedia-dependent niche maintains Drosophila haematopoietic precursors. *Nature* **446**: 320-324

Muller HM, Dimopoulos G, Blass C, Kafatos FC (1999) A hemocyte-like cell line established from the malaria vector Anopheles gambiae expresses six prophenoloxidase genes. *J Biol Chem* **274**: 11727-11735

Ohshiro T, Saigo K (1997) Transcriptional regulation of breathless FGF receptor gene by binding of TRACHEALESS/dARNT heterodimers to three central midline elements in Drosophila developing trachea. *Development* **124**: 3975-3986

Owusu-Ansah E, Banerjee U (2009) Reactive oxygen species prime Drosophila haematopoietic progenitors for differentiation. *Nature* **461**: 537-541

Owusu-Ansah E, Yavari A, Banerjee U (2008) A protocol for in vivo detection of reactive oxygen species. *Nat Protocols* **doi**: 10.1038/nprot.2008.1023

Queenan AM, Ghabrial A, Schupbach T (1997) Ectopic activation of torpedo/Egfr, a Drosophila receptor tyrosine kinase, dorsalizes both the eggshell and the embryo. *Development* **124**: 3871-3880

Rincon-Limas DE, Lu CH, Canal I, Calleja M, Rodriguez-Esteban C, Izpisua-Belmonte JC, Botas J (1999) Conservation of the expression and function of apterous orthologs in Drosophila and mammals. *Proc Natl Acad Sci U S A* **96**: 2165-2170

Sinenko SA, Kim EK, Wynn R, Manfruelli P, Ando I, Wharton KA, Perrimon N, Mathey-Prevot B (2004) Yantar, a conserved arginine-rich protein is involved in Drosophila hemocyte development. *Dev Biol* **273**: 48-62

Sinenko SA, Mathey-Prevot B (2004) Increased expression of Drosophila tetraspanin, Tsp68C, suppresses the abnormal proliferation of ytr-deficient and Ras/Raf-activated hemocytes. *Oncogene* **23**: 9120-9128

Yogev S, Schejter ED, Shilo BZ (2010) Polarized secretion of Drosophila EGFR ligand from photoreceptor neurons is controlled by ER localization of the ligand-processing machinery. *PLoS Biol* **8**

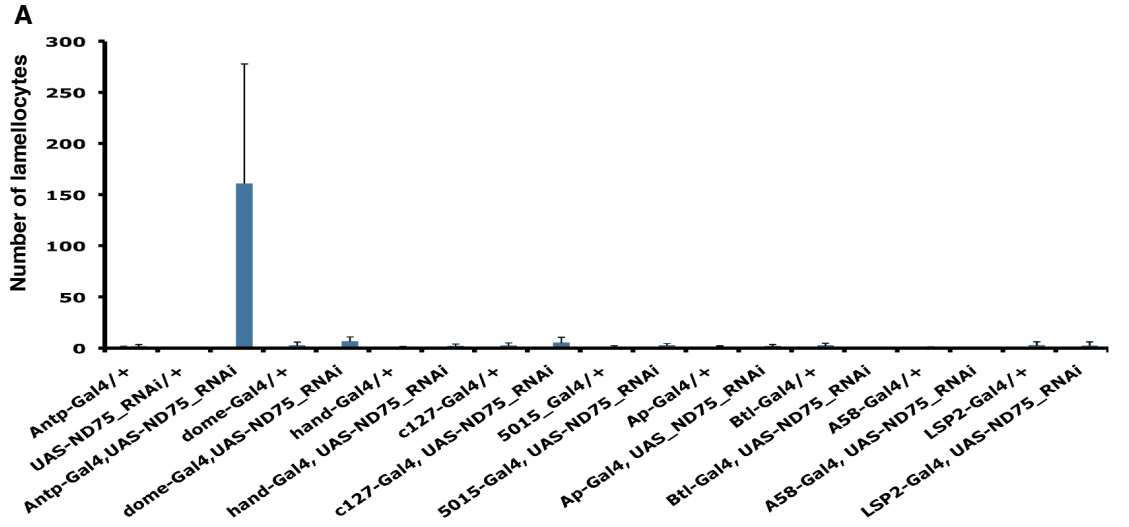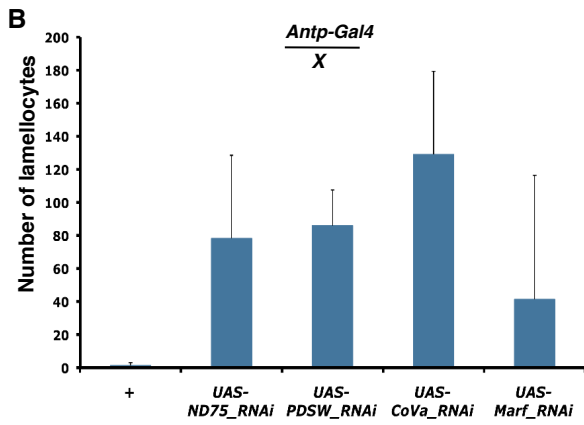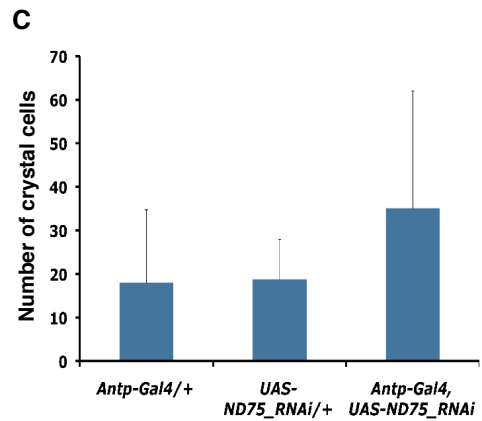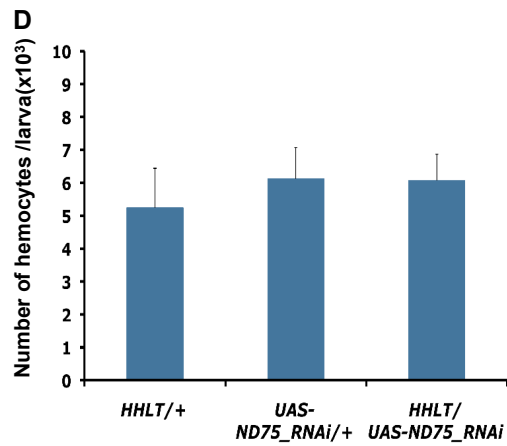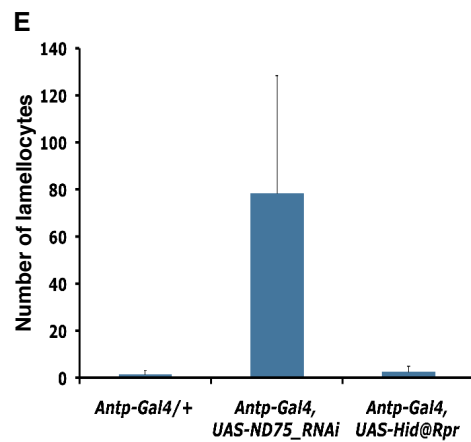

Supplementary Figure 1



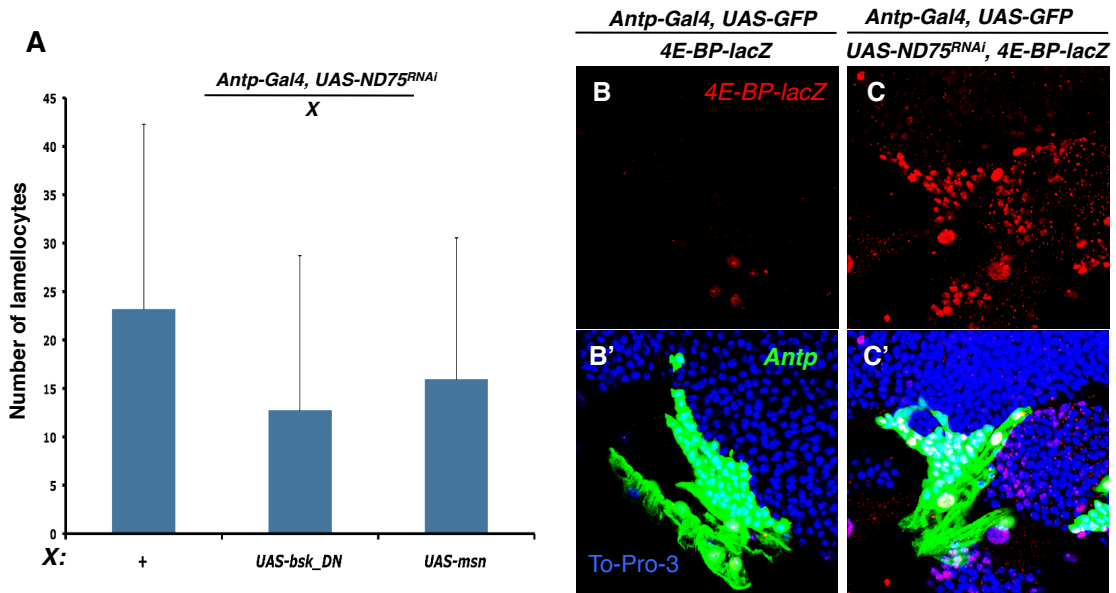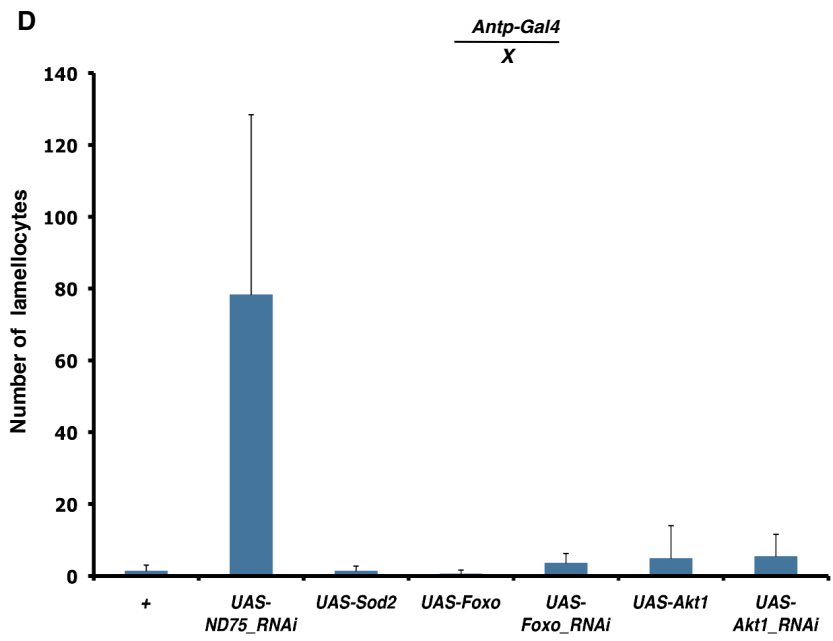

Supplementary Figure 2

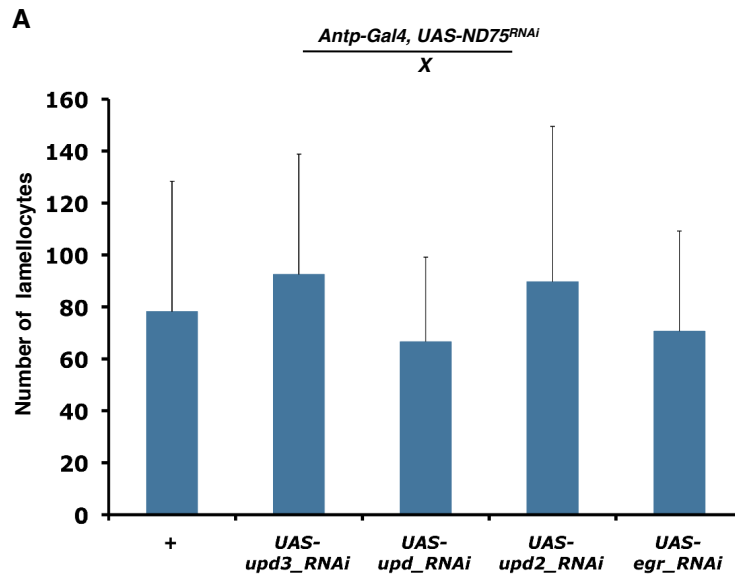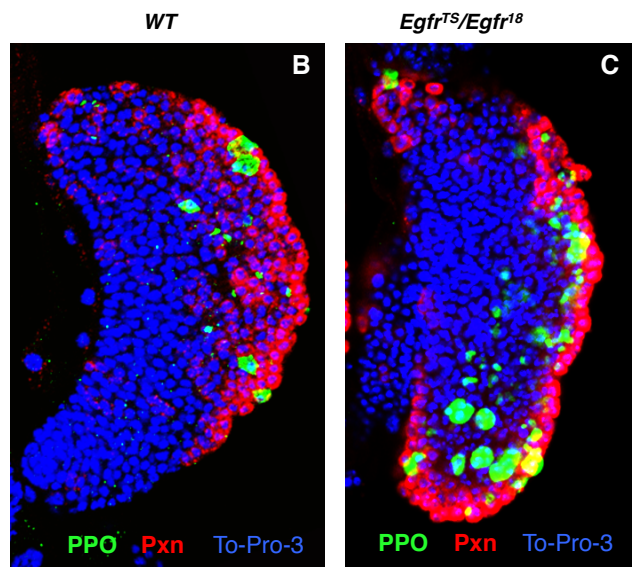

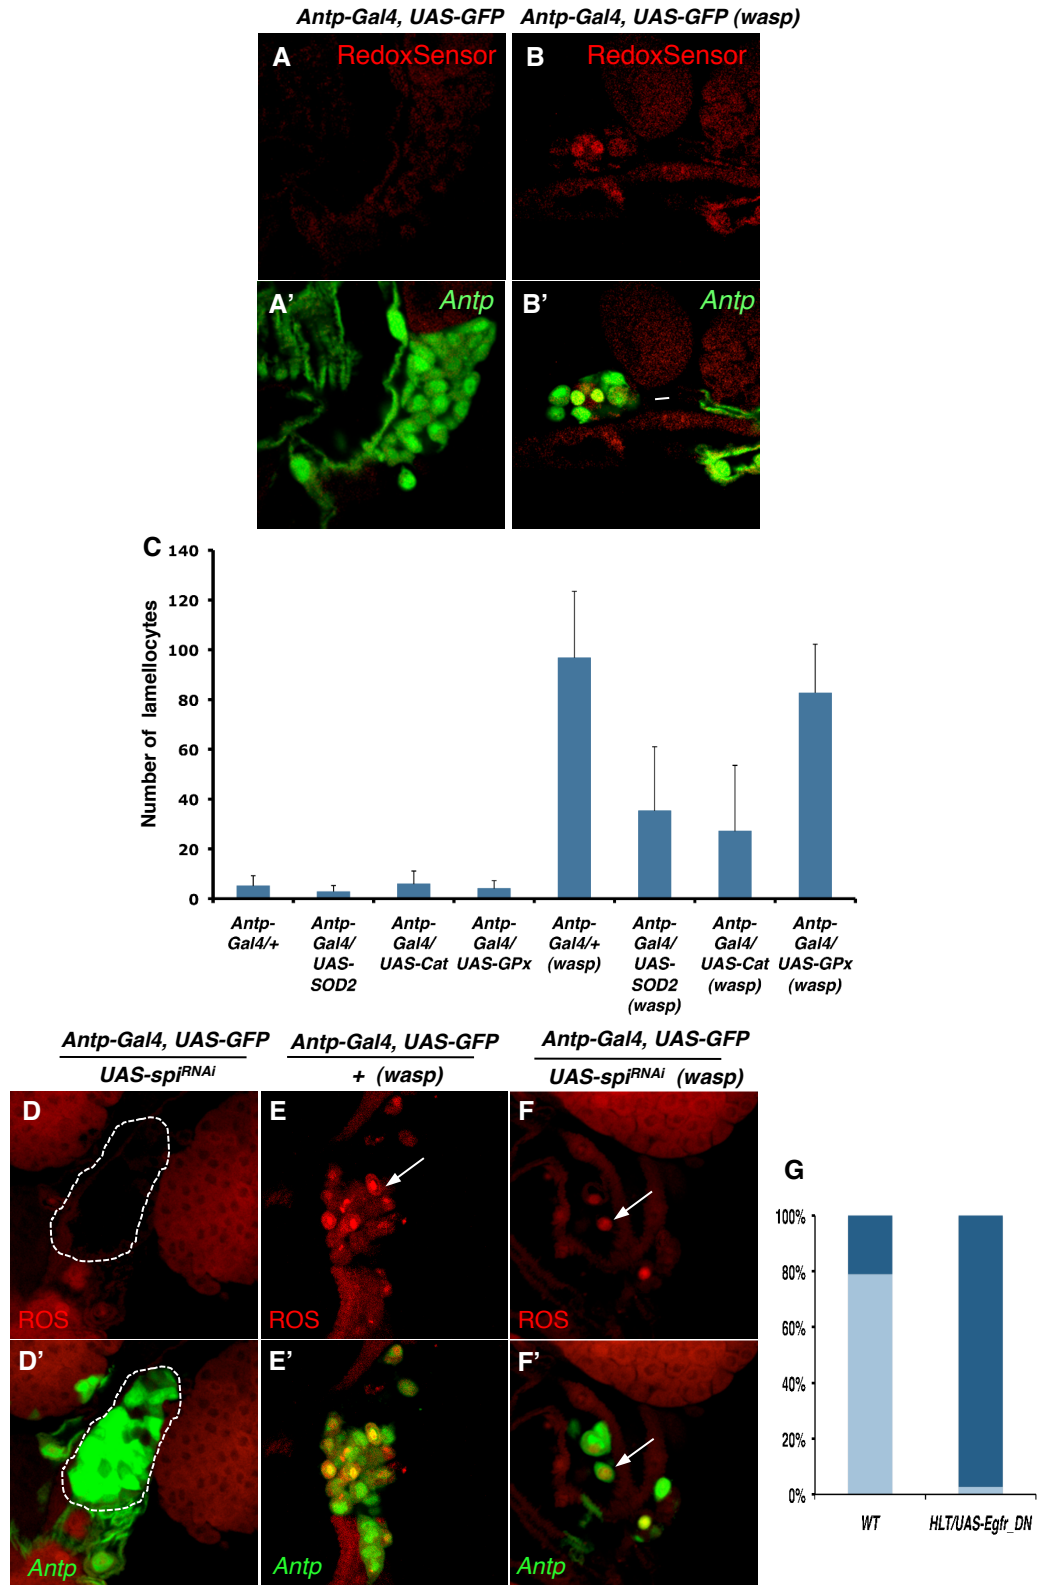

Supplementary Figure 4
